# Supplementary material for: Failure of target attainment of beta-lactam antibiotics in critically ill patients and associated risk factors: a two-center prospective study (EXPAT)
Source: Springer Nature journal article supplement (doi:10.1186/s13054-020-03272-z), 2020-09-15
Supplement: MOESM1 [file 18381960]

## SUPPLEMENTAL MATERIAL

Abdulla et al. 2020: Failure of target attainment of beta-lactam antibiotics in critically ill patients and associated risk factors: a two-center prospective study (EXPAT study)

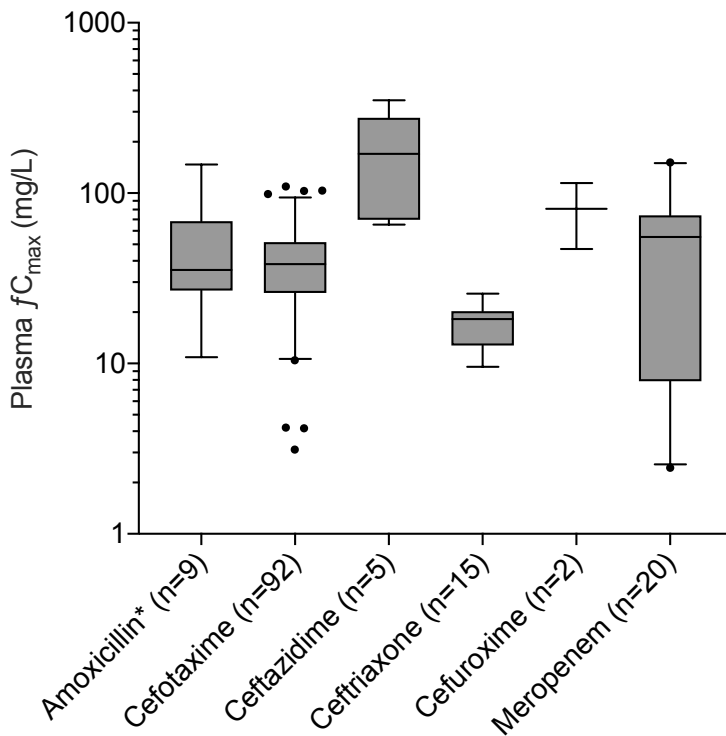

**Figure S1.** Box (median, 25th and 75th percentiles) and whisker (10th and 90th percentiles) plots of unbound peak ( $fC_{max}$ ) plasma concentrations observed in critically ill patients treated with six beta-lactam antibiotics. The numbers of peak samples (n) is presented per antibiotic.

Outliers are removed using ROUT method (Q = 0.5%). Filled circles are remaining outliers.

\*Amoxicillin and Amoxicillin/Clavulanic acid
