# Supplementary material for: Failure of target attainment of beta-lactam antibiotics in critically ill patients and associated risk factors: a two-center prospective study (EXPAT)
Source: Springer Nature journal article supplement (doi:10.1186/s13054-020-03272-z), 2020-09-15
Supplement: MOESM2 [file 18381960]

## SUPPLEMENTAL MATERIAL

Abdulla et al. 2020: Failure of target attainment of beta-lactam antibiotics in critically ill patients and associated risk factors: a two-center prospective study (EXPAT study)

**Table S1.** Characteristics of pooled antibiotic dosing and pharmacokinetic/pharmacodynamic (PK/PD) data

| Dosing and PK/PD data                       | Amoxicillin*<br>(n=9) | Cefotaxime<br>(n=93) | Ceftazidime<br>(n=5) | Ceftriaxone<br>(n=17) | Cefuroxime<br>(n=2) | Meropenem<br>(n=21) | Total<br>(n=147) |
|---------------------------------------------|-----------------------|----------------------|----------------------|-----------------------|---------------------|---------------------|------------------|
| Dosage per 24h (g)                          | 6.0 [4.0-6.0]         | 4.0 [4.0-4.0]        | 3.0 [2.5-5.0]        | 2.0 [2.0-2.0]         | 4.5 [4.5-4.5]       | 3.0 [2.0-3.0]       |                  |
| DDD                                         | 1.66 ±0.42            | 1.06 ±0.18           | 1.20 ±0.45           | 1.18 ±0.39            | 1.50                | 0.83 ±0.21          |                  |
| No. of samples                              | 4.89 ±0.33            | 4.94 ±0.25           | 4.80 ±0.45           | 4.65 ±0.61            | 4.50 ±0.71          | 4.67 ±0.80          | 4.85 ±0.44       |
| Mean <sup>#</sup> C <sub>min</sub> (mg/L)   | 12 ±13                | 7.8 ±6.6             | 60 ±48               | 5.9 ±4.1              | 6.0 ±2.8            | 9.1 ±11             |                  |
| Median <sup>#</sup> C <sub>min</sub> (mg/L) | 6.0 [3.2-21]          | 6.1 [2.0-12]         | 52 [24-88]           | 5.1 [2.2-9.0]         | 6.6 [2.9-8.4]       | 4.7 [1.8-14]        |                  |
| Range <sup>#</sup> C <sub>min</sub> (mg/L)  | 1.2-43                | 0.14-26              | 11-158               | 0.43-15               | 2.9-8.4             | 0.13-40             |                  |
| Mean <sup>#</sup> C <sub>max</sub> (mg/L)   | 51 ± 41               | 42 ±23               | 173 ±116             | 17 ±4.7               | 5.5 ±3.6            | 53 ±45              |                  |
| Median <sup>#</sup> C <sub>max</sub> (mg/L) | 35 [27-51]            | 38 [26-51]           | 170 [70-278]         | 18 [13-20]            | 5.1 [2.3-8.3]       | 7.9 [7.9-74]        |                  |
| Range <sup>#</sup> C <sub>max</sub> (mg/L)  | 11-136                | 3.1-106              | 65-286               | 9.6-16                | 1.2-11              | 2.4-149             |                  |
| %fT>MIC <sub>E<sub>COFF</sub></sub>         | 69.8%                 | 81.4%                | 100%                 | 99.7%                 | 44.3%               | 90.5%               | 84.2%            |
| %fT>4xMIC <sub>E<sub>COFF</sub></sub>       | 25.6%                 | 46.6%                | 80.4%                | 98.3%                 | 12.7%               | 58.8%               | 53.7%            |
| 40%fT>MIC <sub>E<sub>COFF</sub></sub>       | 77.8%                 | 91.4%                | 100%                 | 100%                  | 50%                 | 95.2%               | 91.8%            |
| 50%fT>MIC <sub>E<sub>COFF</sub></sub>       | 66.7%                 | 81.7%                | 100%                 | 100%                  | 50%                 | 95.2%               | 85.0%            |
| 60%fT>MIC <sub>E<sub>COFF</sub></sub>       | 55.6%                 | 75.3%                | 100%                 | 100%                  | 0%                  | 90.5%               | 78.9%            |
| 70%fT>MIC <sub>E<sub>COFF</sub></sub>       | 55.6%                 | 69.9%                | 100%                 | 100%                  | 0%                  | 90.5%               | 75.5%            |
| 100%fT>MIC <sub>E<sub>COFF</sub></sub>      | 44.4%                 | 57.0%                | 100%                 | 94.1                  | 0%                  | 71.4%               | 63.3%            |
| 100%fT>4xMIC <sub>E<sub>COFF</sub></sub>    | 22.2%                 | 17.2%                | 60%                  | 82.4%                 | 0%                  | 42.9%               | 36.7%            |

Values are presented as numbers (%), median [25%-75% interquartile range], or mean (± standard deviation).

## SUPPLEMENTAL MATERIAL

Abdulla et al. 2020: Failure of target attainment of beta-lactam antibiotics in critically ill patients and associated risk factors: a two-center prospective study (EXPAT study)

\* Amoxicillin (n=7) and amoxicillin/clavulanic acid (n=2).

# Outliers removed using ROUT method (Q = 0.5%).

Abbreviations: **DDD**: Defined Daily Dose; **ECOFF**: epidemiological cut-off breakpoint; **fC<sub>max</sub>**: unbound peak plasma concentrations; **fC<sub>min</sub>**: unbound trough plasma concentration; **fT>MIC**: the unbound concentrations above the minimum inhibitory concentration; **IQR**: interquartile range; **MIC**: Minimal Inhibitory Concentration
